# Supplementary material
Source: PubMed Central journal article supplement (PMC8818088)
Supplement: NIHMS1743013-supplement-Supplementary_Figure_1.pdf [file NIHMS1743013-supplement-Supplementary_Figure_1.pdf]

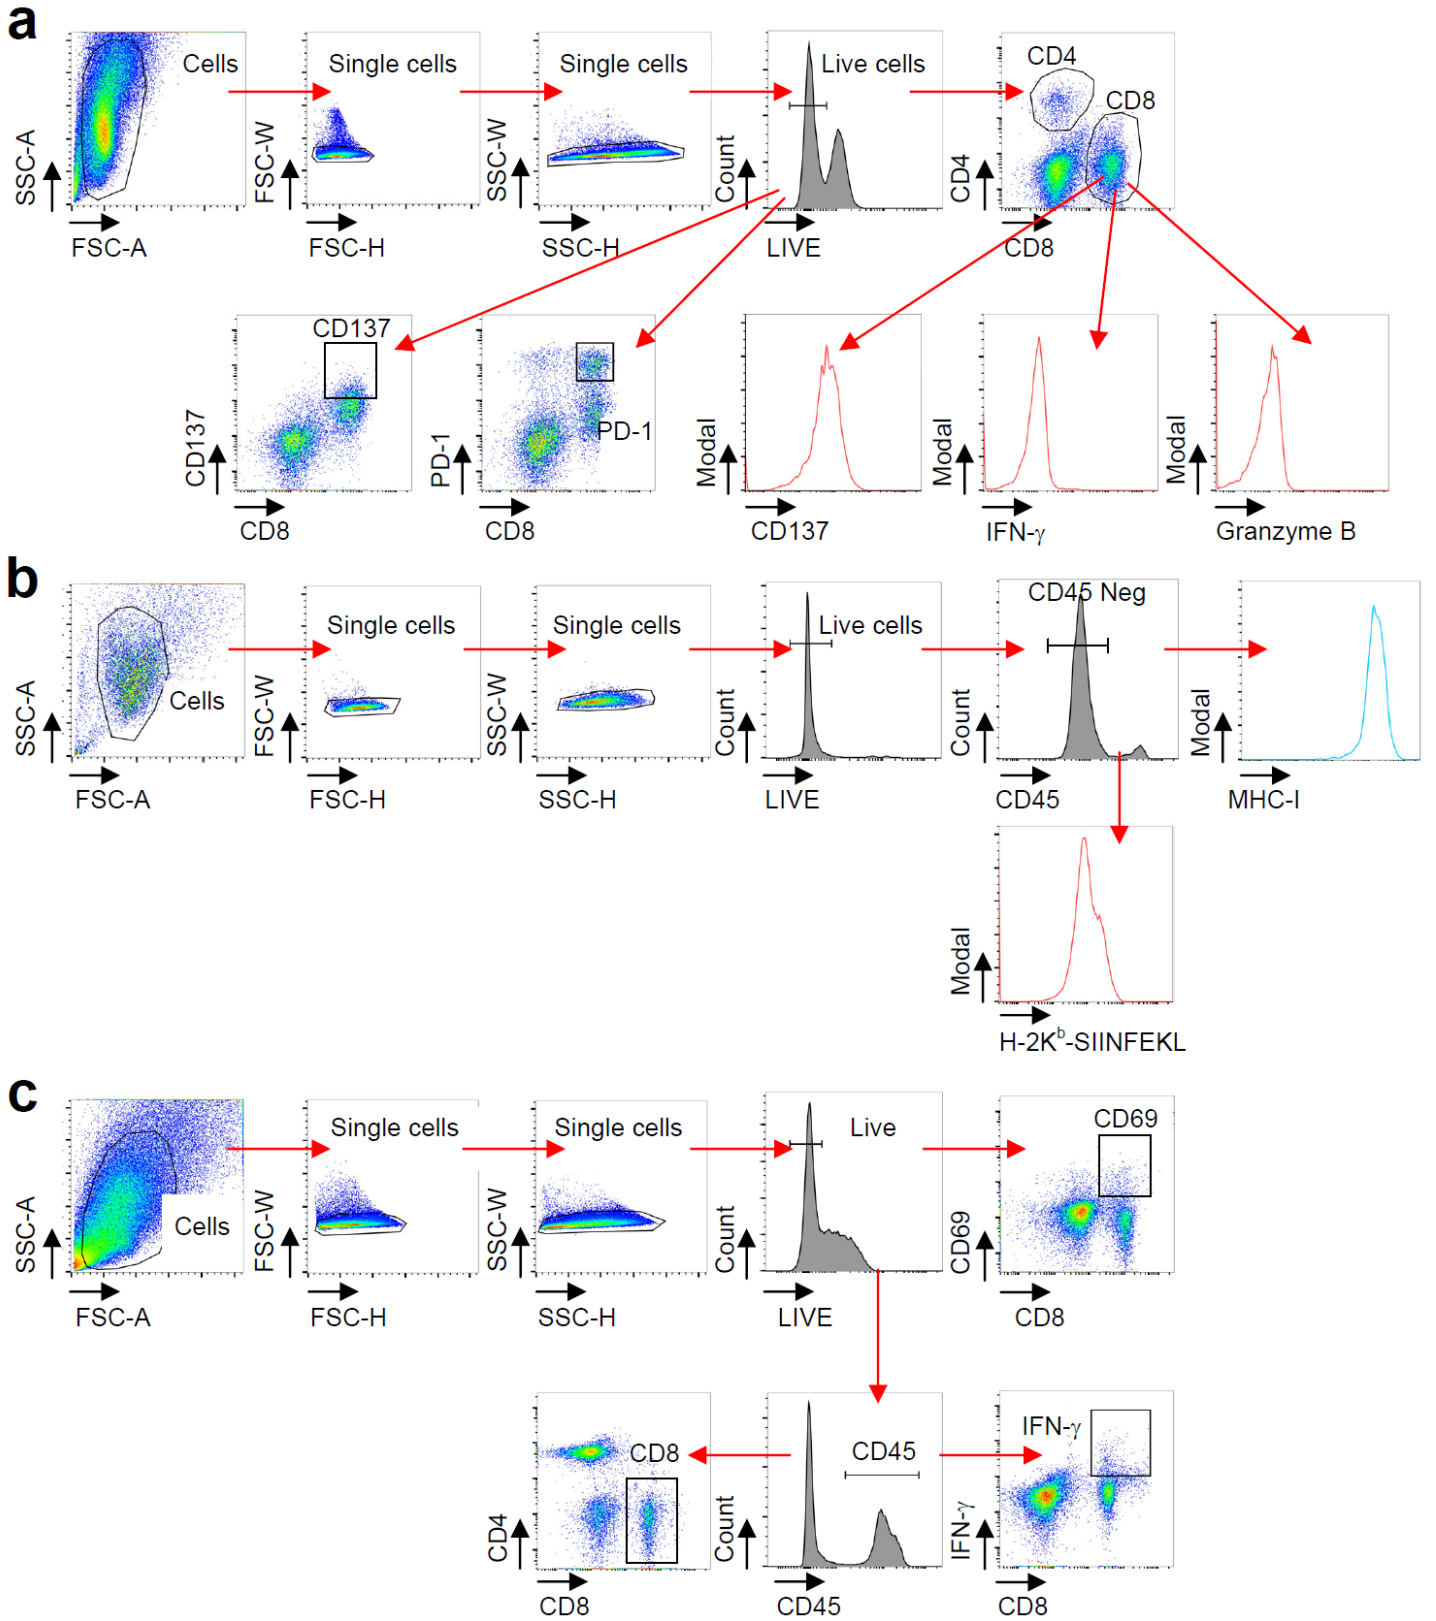

**Supplementary Fig. 1 Gating strategies for cell populations in FACS analysis. a,**

Gating strategy for co-culture samples. Splenocytes after co-culture were collected. Live cells were gated out from single cells of general leukocyte size. The population was then analyzed with CD8, CD137, and PD-1 as indicated. Meanwhile, CD8 positive population was gated out from live cells and was subjected to CD137, IFN- $\gamma$ , and Granzyme B analysis. **b,** Py8119-OVA cells in co-culture are shown as an example for OVA (H-2K<sup>b</sup>-SIINFEKL) and MHC-I presentation analysis. **c,** PyMT primary tumors are shown as an example for in vivo CD8 infiltration and immune cell activation analysis. Live cells were gated out from single cells of general leukocyte size. The population was then analyzed with CD45 and CD69. CD45 positive population was also gated out from live cells followed by CD8 and IFN- $\gamma$  analysis.
