# Supplementary material
Source: PubMed Central journal article supplement (PMC8818088)

**Extended Data Fig. 1a**

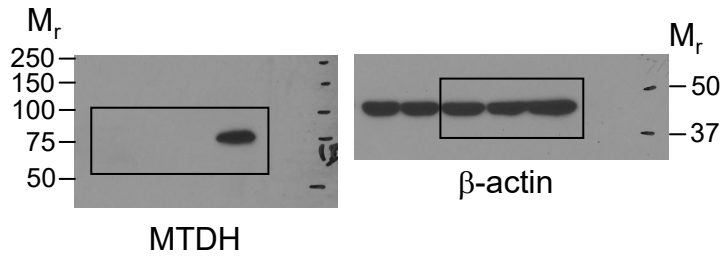

**Extended Data Fig. 1b**

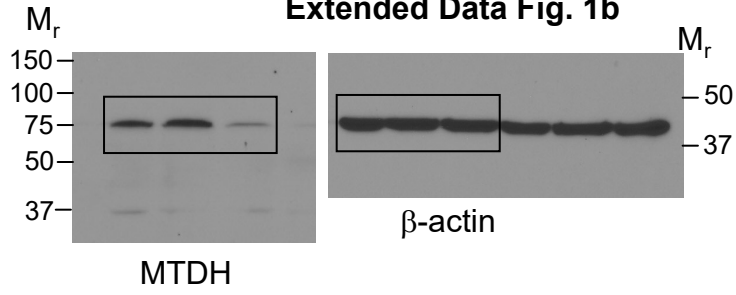

**Extended Data Fig. 1c**

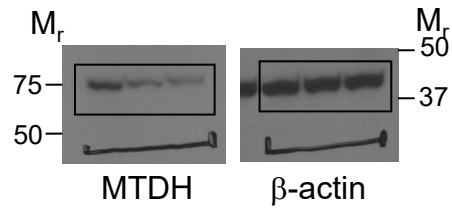

Supplement: NIHMS1743013-supplement-Unmodified_Blots_for_Extended_Fig_1.pdf [file NIHMS1743013-supplement-Unmodified_Blots_for_Extended_Fig_1.pdf]

**Extended Data Fig. 3b**

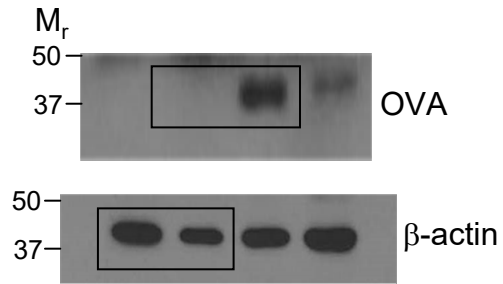

**Extended Data Fig. 3f**

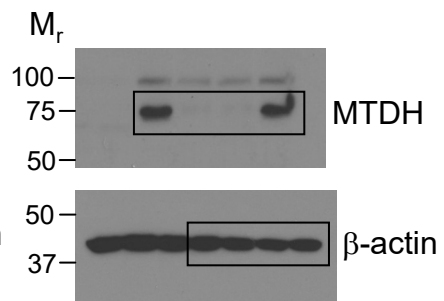

Supplement: NIHMS1743013-supplement-Unmodified_Blots_for_Extended_Fig_3.pdf [file NIHMS1743013-supplement-Unmodified_Blots_for_Extended_Fig_3.pdf]

**Extended Data Fig. 5a**

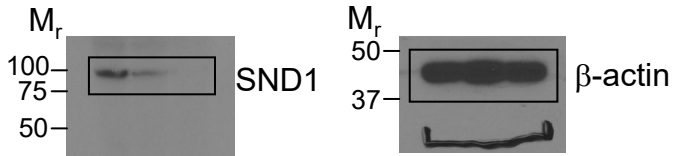

**Extended Data Fig. 5d**

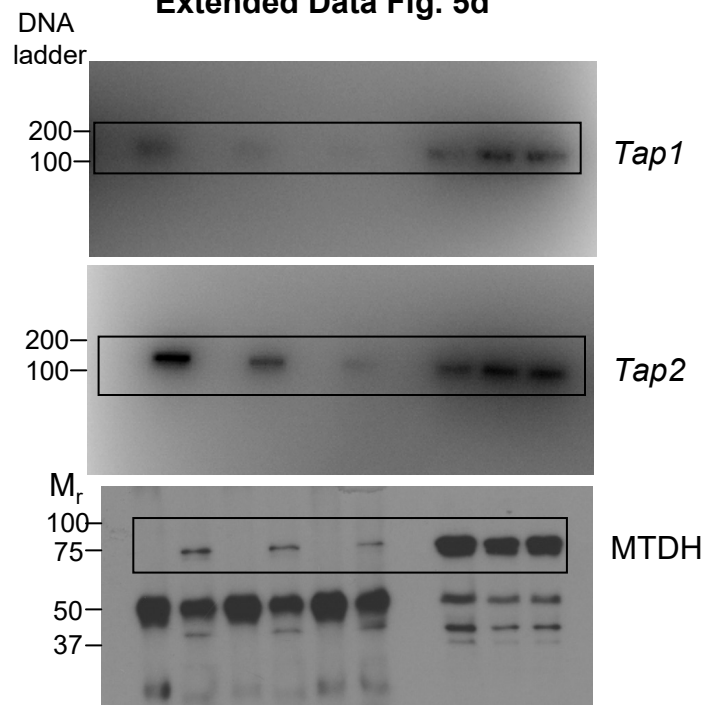

**Extended Data Fig. 5f**

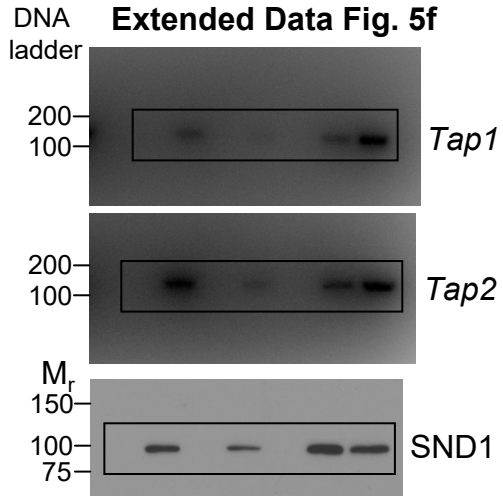

**Extended Data Fig. 5h**

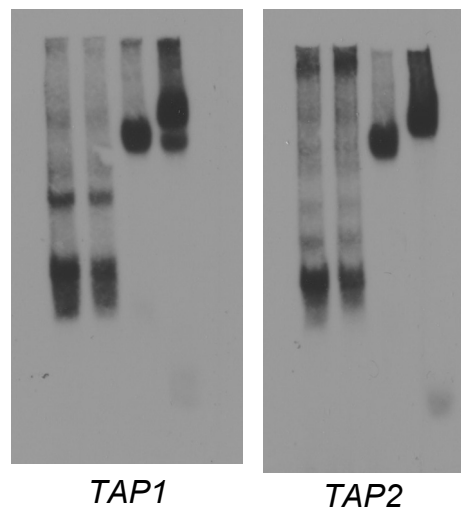

Supplement: NIHMS1743013-supplement-Unmodified_Blots_for_Extended_Fig_5.pdf [file NIHMS1743013-supplement-Unmodified_Blots_for_Extended_Fig_5.pdf]

**Extended Data Fig. 7b**

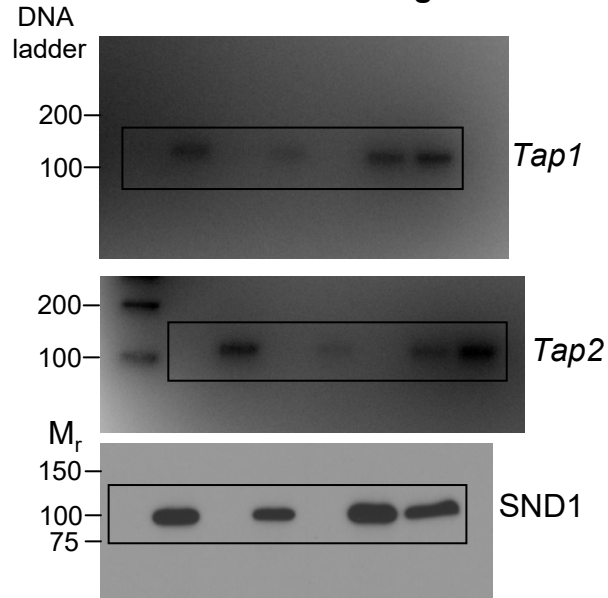

Supplement: NIHMS1743013-supplement-Unmodified_Blots_for_Extended_Fig_7.pdf [file NIHMS1743013-supplement-Unmodified_Blots_for_Extended_Fig_7.pdf]

**Extended Data Fig. 8a**

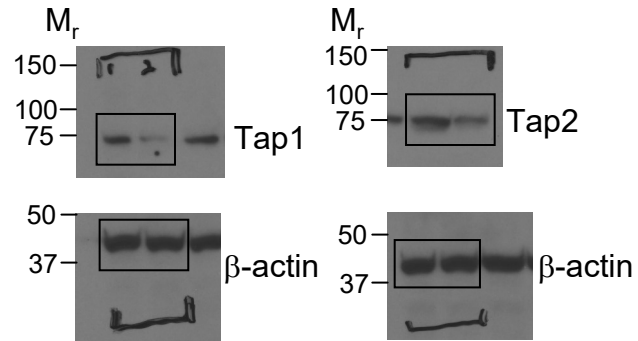

**Extended Data Fig. 8g**

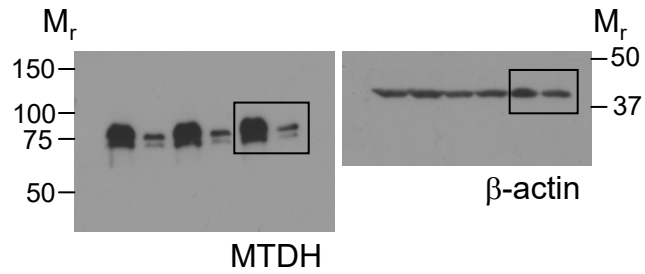

Supplement: NIHMS1743013-supplement-Unmodified_Blots_for_Extended_Fig_8.pdf [file NIHMS1743013-supplement-Unmodified_Blots_for_Extended_Fig_8.pdf]

**Fig. 2c**

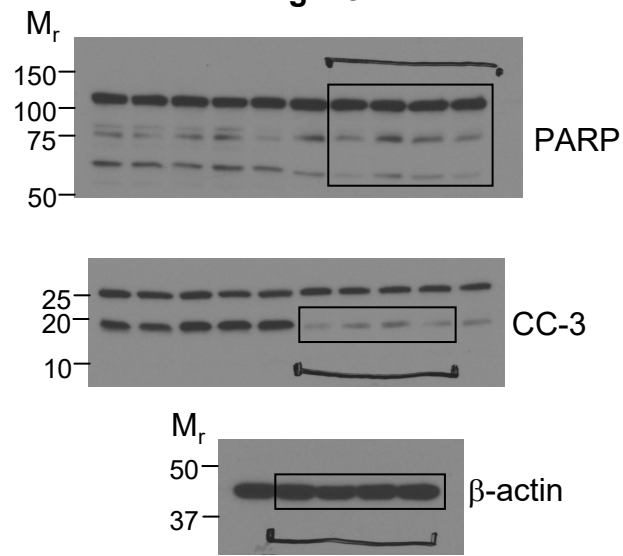

Supplement: NIHMS1743013-supplement-Unmodified_Blots_for_Fig_2.pdf [file NIHMS1743013-supplement-Unmodified_Blots_for_Fig_2.pdf]

**Fig. 3b**

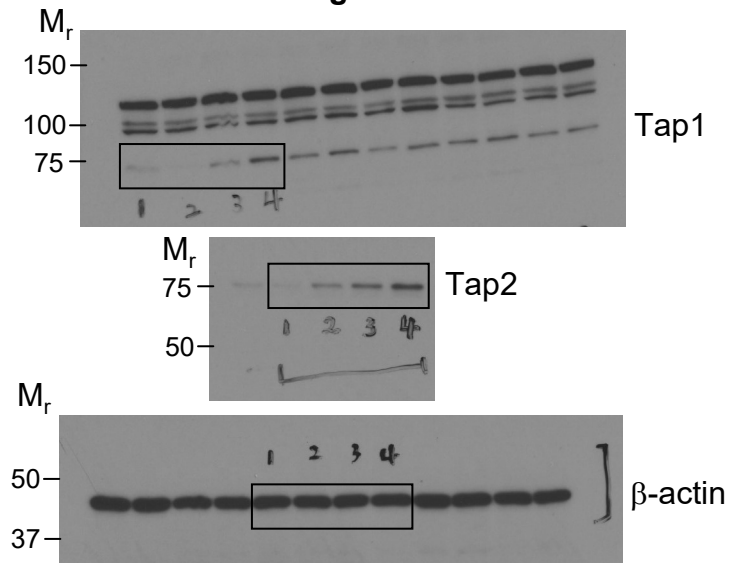

**Fig. 3d**

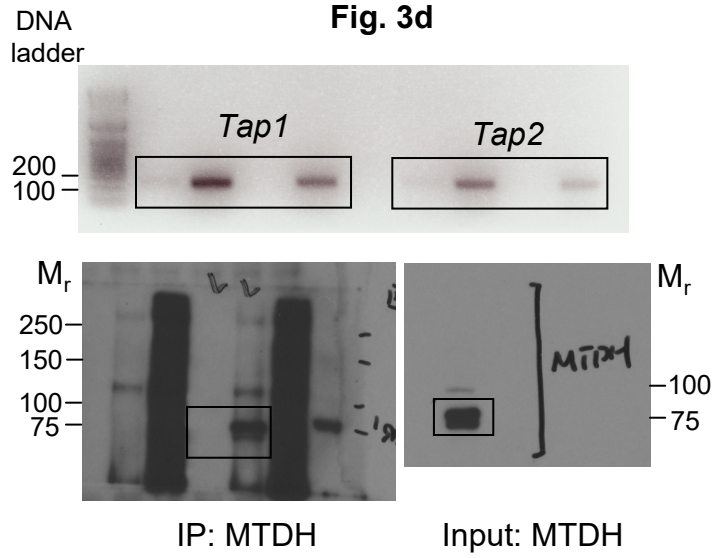

Supplement: NIHMS1743013-supplement-Unmodified_Blots_for_Fig_3.pdf [file NIHMS1743013-supplement-Unmodified_Blots_for_Fig_3.pdf]

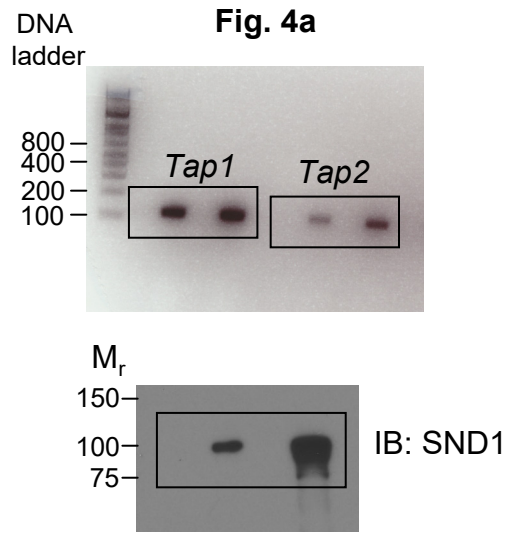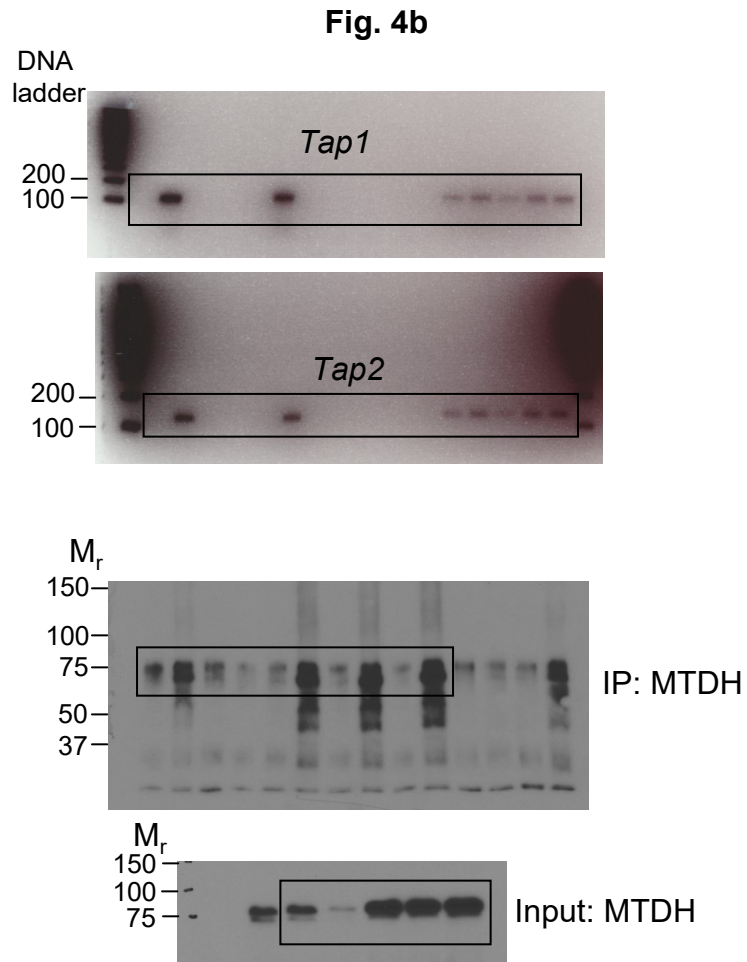

Supplement: NIHMS1743013-supplement-Unmodified_Blots_for_Fig_4.pdf [file NIHMS1743013-supplement-Unmodified_Blots_for_Fig_4.pdf]

**Fig. 5c**

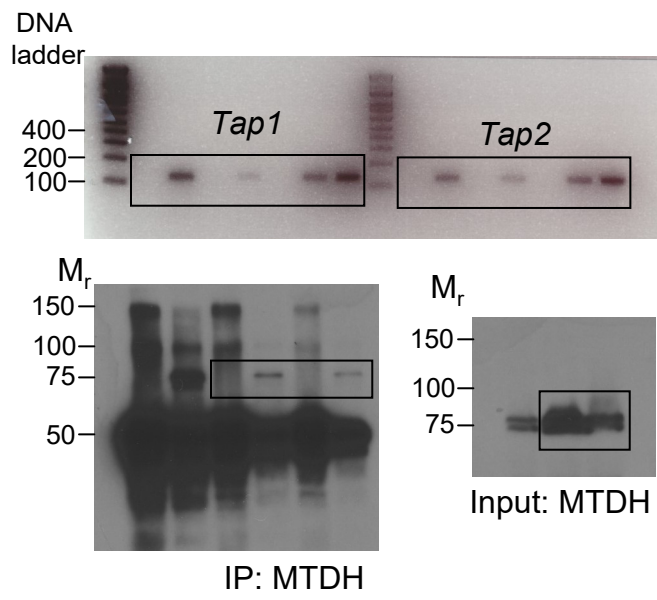

Supplement: NIHMS1743013-supplement-Unmodified_Blots_for_Fig_5.pdf [file NIHMS1743013-supplement-Unmodified_Blots_for_Fig_5.pdf]
